# Supplementary material for: Long-term dynamics of multisite phosphorylation
Source: PubMed Central journal article supplement — Mol Biol Cell. 2016 Jul 15;27(14):2331–40. doi: 10.1091/mbc.E16-03-0137 (PMC4945148; doi:10.1091/mbc.e16-03-0137), 2016-07-15
Supplement: supp_E16-03-0137v1_CombinedSupMats.pdf [file supp_E16-03-0137v1_CombinedSupMats.pdf]

# Supplemental Materials

*Molecular Biology of the Cell*

Rubinstein et al.
